# Supplementary material for: Epigenetic Clock Deceleration and Maternal Parity: Associations With Increasing Grey Matter Volume of the Precuneus
Source: Research Square preprint supplement (doi:10.21203/rs.3.rs-111892/v1), 2020-11-25
Supplement: Supplementary file 1 [file 3d935c7edb9a1e658ec2145e.pdf]

# Supplementary Information

## Epigenetic clock deceleration and maternal parity: Associations with increasing grey matter volume of the precuneus

Shota Nishitani<sup>1,2,3</sup>, Ryoko Kasaba<sup>1,2</sup>, Daiki Hiraoka<sup>1,4</sup>, Koji Shimada<sup>1,2,5</sup>, Takashi X Fujisawa<sup>1,2,3</sup>, Akemi Tomoda<sup>1,2,3,6\*</sup>

---

<sup>1</sup>Research Center for Child Mental Development, University of Fukui

<sup>2</sup>Division of Developmental Higher Brain Functions, United Graduate School of Child Development, University of Fukui

<sup>3</sup>Life Science Innovation Center, University of Fukui

<sup>4</sup>Japan Society for the Promotion of Science

<sup>5</sup>Biomedical Imaging Research Center, University of Fukui

<sup>6</sup>Department of Child and Adolescent Psychological Medicine, University of Fukui Hospital

\*to whom correspondence should be addressed: [atomoda@u-fukui.ac.jp](mailto:atomoda@u-fukui.ac.jp)

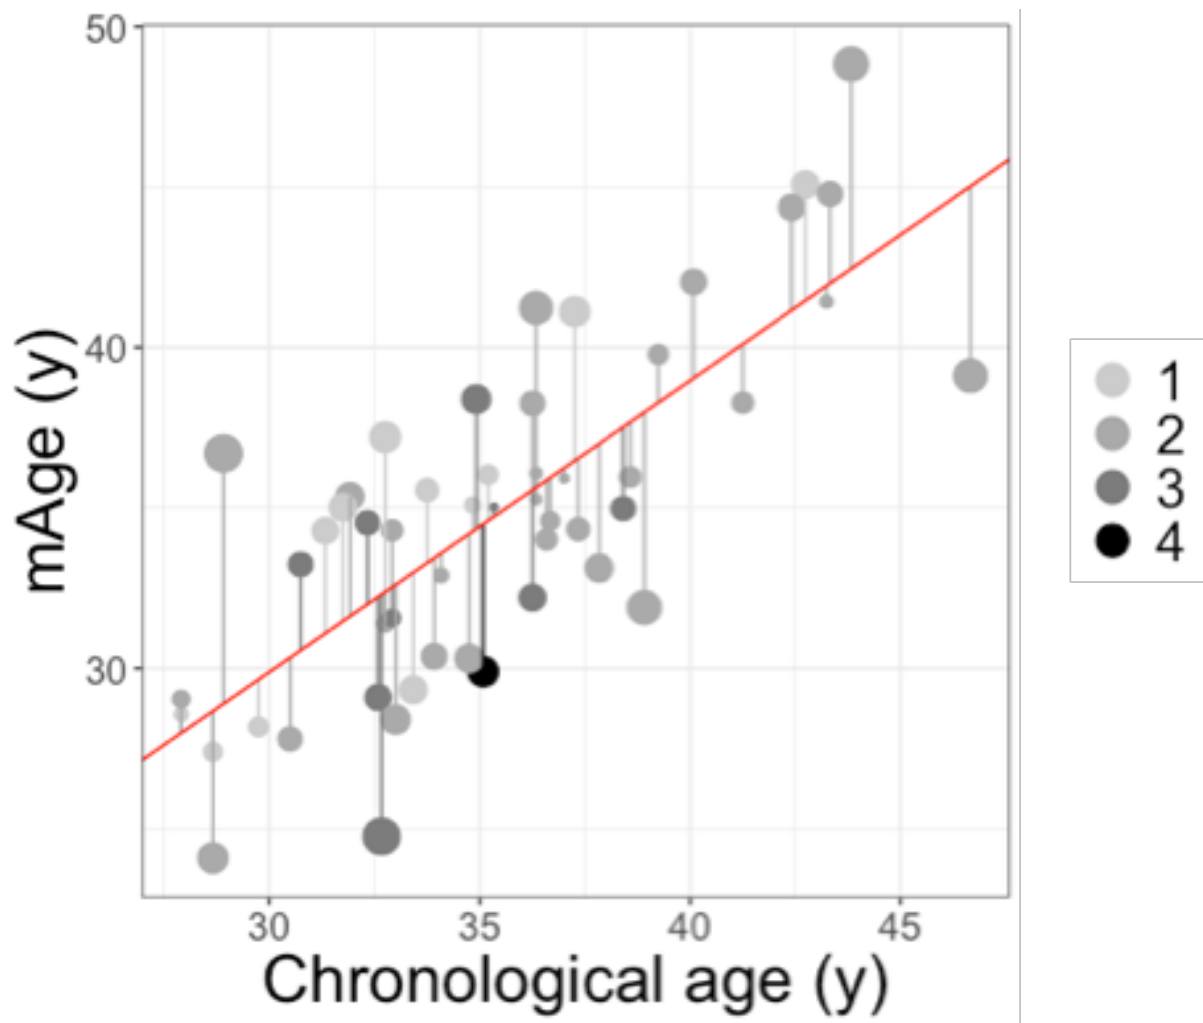

**Supplementary Figure S1.**

A linear regression of methylation age (mAge) prediction using Horvath's epigenetic clock. The individual unstandardized residuals (age acceleration) were indicated by the size of points and distance from the regression line. The grey scale indicates the number of delivery.

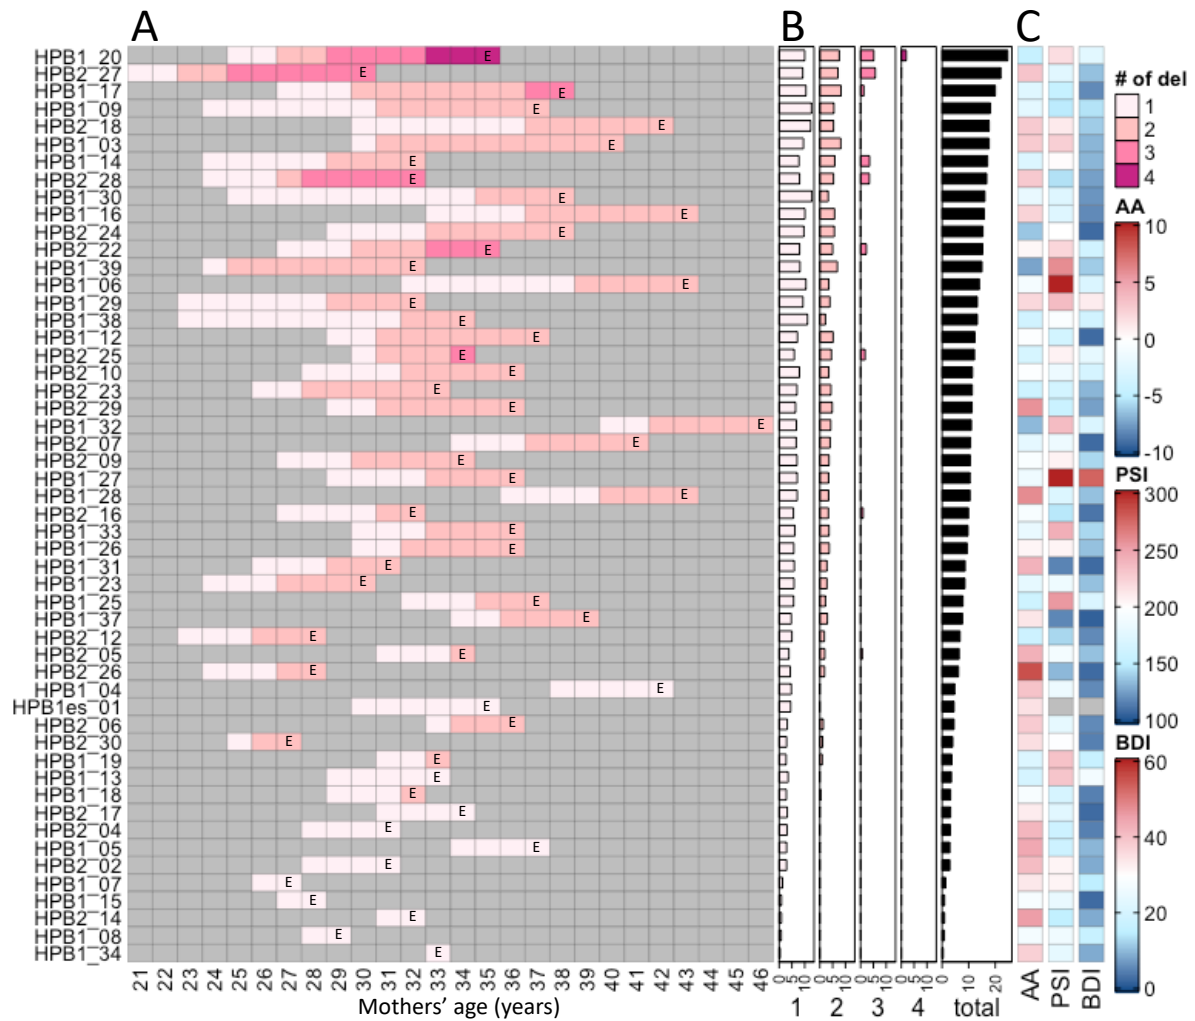

**Supplementary Figure S2.**

(A) A plot for when participating mothers gave child birth and how many children they had been rearing until the day of the experiment (E). The color scale indicates the number of delivery. (B) Each age (years) of child from 1<sup>st</sup> to 4<sup>th</sup> children and total of the age (years) of all the children (= cumulative motherhood period). (C) AA; age acceleration, PSI; parental stress index (Abidin 1995, Namara *et al.*, 1999), BDI-II: The Beck Depression Inventory-II (Beck, Steer, & Brown, 1996; Kojima *et al.*, 2002). The color scale reflects each metric.
